1                    **Resistance of *Musa balbisiana* accessions of the Philippines**  
2                                            **to *banana bunchy top virus***

3  
4                    Fe M. Dela Cueva<sup>1</sup>, Nicole Angelee M. Perez<sup>1</sup>, Ann Fatima A. Benjamin<sup>1</sup>,  
5                    Lyka A. Yanos<sup>2</sup>, Lavernee S. Gueco<sup>2</sup>, and John E. Thomas<sup>3</sup>

6  
7                    <sup>1</sup>Plant Pathology Laboratory, Institute of Plant Breeding, College of Agriculture and Food  
8                    Science, University of the Philippines Los Baños, College, Laguna

9                    <sup>2</sup>National Plant Genetic Resources Laboratory, Institute of Plant Breeding, College of  
10                    Agriculture and Food Science, University of the Philippines Los Baños, College, Laguna

11                    <sup>3</sup>Queensland Alliance for Agriculture and Food Innovation, University of Queensland,  
12                    Brisbane, Australia

13                    corresponding author: N. A. M. Perez Email: [pereznicoleangelee@gmail.com](mailto:pereznicoleangelee@gmail.com)

14

15

16                    **Keywords:** Banana bunchy top virus, wild banana, *Musa balbisiana*, *M. acuminata*  
17                    subsp. *errans*, resistance

18

19

20                    **Funding:** Queensland Alliance for Agriculture and Food Innovation, University of  
21                    Queensland / Bill and Melinda Gates Foundation Inc.

22 **Abstract**

23 Mitigation of banana bunchy top disease (BBTD) is still a challenge worldwide. BBTD is  
24 caused by banana bunchy top virus (BBTV), the most important virus affecting banana.  
25 Currently, no cultivar or accession of banana has complete resistance to BBTD. A total  
26 of 36 wild *Musa* spp. accessions, including 34 *Musa balbisiana* and two *M. acuminata*  
27 subsp. *errans* ('Agutay'), were screened for resistance against BBTV. In greenhouse  
28 tests using viruliferous banana aphids (*Pentalonia nigronervosa*), all *M. balbisiana*  
29 accessions remained symptomless and BBTV was not detected in any of these plants  
30 by PCR at three- and six-months post inoculation. In contrast, 100% disease incidence  
31 was recorded in *M. acuminata* subsp. *errans* and in cv. Lakatan susceptible control  
32 plants. The PCR-negative *M. balbisiana* plants were then transferred to a field with high  
33 BBTV inoculum pressure where they remained symptomless and PCR-negative for up  
34 to five years, while all cv. Lakatan developed BBTD. This study confirmed the resistance  
35 of wild *M. balbisiana* accessions to BBTV. It is therefore expected to provide a resource  
36 for conventional and marker assisted breeding.

37

38

39

40

41

42

43

## 44 Introduction

45 Banana bunchy top disease (BBTD) continues to spread and affect banana  
46 production worldwide. Recent records include the first reports of BBTV from Tanzania  
47 (Mpoki et al., 2021; and Uganda (Ocimati et al., 2021). The occurrence of this disease in  
48 banana cropping areas planted with susceptible varieties can result in a total yield loss  
49 (Qazi, 2015). Once infected with BBTV, plants rarely recover. Banana bunchy top virus  
50 (BBTV; genus *Babuvirus*, family *Nanoviridae*) is the causal agent of BBTD and its  
51 genome comprises six circular ssDNA components (Harding et al., 1991; Xie & Hu,  
52 1995). The major vector is the banana aphid or *Pentalonia nigronervosa* (Dela Cueva et  
53 al., 2015; Thomas, 2008). Long-distance transmission is attributed to the movement of  
54 infected planting materials (Thomas et al., 1994).

55 BBTV occurs widely in Africa, Asia, and the Pacific and is difficult to control.  
56 Common strategies against the disease are quarantine, eradication of infected plants,  
57 and the use of clean planting material (Thomas, 2019). Widely used control practices in  
58 the Philippines is eradication of infected plants using bamboo sticks dipped in herbicide,  
59 and the use of clean planting materials (Aguilar et al., 2010; Molina et al., 2009). A  
60 number of studies have explored the potential of transgenic resistance to BBTV in  
61 bananas (Borth et al., 2011; Shekhawat et al., 2012; Elayabalan et al., 2013; Mware et  
62 al 2016) but to date, these advances have not been successfully transferred to a field  
63 situation. Biopriming with endophytic and rhizosphere bacteria (Kavino et. al., 2007;  
64 Harish et al., 2009; Jebakumar and Selvarajan 2018) has shown some promise for  
65 BBTD control when applied prior to infection, resulting in reduced incidence of infection  
66 and a delay in symptom expression under greenhouse conditions. Screening and

67 breeding of new *Musa* spp. cultivars have been done in attempts to improve resistance  
68 to important banana pests and diseases (Ortiz, 2013), but BBTv still poses a challenge  
69 as there are still no known natural sources of resistance against this virus (Shekhawat et  
70 al., 2012).

71 The wild species of banana, *M. acuminata* (AAw) and *M. balbisiana* (BBw), are  
72 the major sources of the genomes of edible bananas cultivated today, contributing “A”  
73 genome and “B” genome components, respectively (Valmayor et al., 2002;  
74 Venkataramana et al., 2015). Though ultimately susceptible, banana cultivars can differ  
75 markedly in the ease of infection with BBTv and with the intensity of symptoms  
76 expressed and it has often been observed that banana cultivars with a B genome  
77 component tend to display a level of resistance to BBTv (Ngatat et al., 2017; Jose, 1981;  
78 Muharam; 1984, Espino et al., 1993; Niyongere et al., 2011; Sachter-Smith, 2015;  
79 Hapsari and Masrum; 2012, Latifah et al., 2021). Resistance against important diseases  
80 has been sought in genotypes of banana from the wild (Jenny et al., 2002) though none  
81 have been conclusively established for BBTv. The Philippines has a diverse collection  
82 of species of banana from the wild (Valmayor et al., 2002). Recognizing this potential,  
83 this study screened Philippines wild-type banana species, predominantly *M. balbisiana*,  
84 from the germplasm collection of National Plant Genetic Resources Laboratory, Institute  
85 of Plant Breeding (NPGRL, IPB) for resistance against BBTv.

86

87

88

## 89 **Materials and methods**

90 *Study Site.* The screening trial of wild banana was conducted in a greenhouse  
91 (14°9'19"N, 121°15'40"E) and field research site (14°8'60"N, 121°16'20"E) at the  
92 Institute of Plant Breeding, College of Agriculture and Food Science, University of the  
93 Philippines-Los Baños (IPB, CAFS, UPLB). The study started in November 2015 and  
94 the experimental field was selected due to the prevalence of BBTV and banana aphid in  
95 the area. The field trial site occupied 7,950 m<sup>2</sup> with nine experimental plots. Plant  
96 spacing was 1m within rows and 2m between. The area had an average rainfall of 1700  
97 mm and annual mean temperature of 23.8°C (minimum) and 31.7°C (maximum) from  
98 2016-2021.

99 *Preparation of Musa accessions.* Thirty-six wild banana accessions of the Philippines  
100 were screened in the study. It includes 34 *Musa balbisiana* accessions and two *M.*  
101 *acuminata* subsp. *errans*. The wild banana progenitors were collected from different  
102 regions of the Philippines as illustrated in figure 1. The collection site and identification  
103 of each accession are specified in table 1. The two *M. acuminata* subsp. *errans* and 32  
104 *M. balbisiana* accessions were derived from seeds. The remaining two *M. balbisiana* are  
105 tissue-cultured. Test plants from seeds and tissue culture were transplanted to pots with  
106 sterilized soil and coir dust at a ratio of 1:3. Test plants were incubated under  
107 greenhouse conditions. Two-month-old seedlings were used in artificial inoculation of  
108 BBTV.

109 *Collection of BBTV inoculum and aphid vector.* Reference BBTV isolate REF2-LAG was  
110 obtained from banana cv. Lakatan with typical BBTV symptoms from Los Baños,  
111 Laguna, Philippines. An 861 nt fragment of the DNA-R segment of the isolate was

112 obtained using primer pair BBTVREP-F and BBTVREP-R (Islam et al. 2010). The  
113 resulting sequence was deposited in GenBank with accession code ON038409. For the  
114 banana aphid vector (*Pentalonia nigronervosa*), a colony was derived from a virus-free  
115 wingless nymph reared on virus-free banana cv. Lakatan plants (Parna & Agarwala,  
116 2010). Modified Dellaporta minipreparation procedure was used in the extraction of  
117 aphid DNA (Dellaporta et al., 1983). PCR Primers LepF and LepR (Hebert et al. 2004)  
118 were used to amplify the mitochondrial cytochrome c oxidase I gene. The PCR  
119 conditions used are as follows: 94°C for 2 min, 35 cycle of 94°C for 1 min, 56°C for 30 s  
120 and 72°C for 1 min, and final extension at 72°C for 5 min. The amplicon was sequenced,  
121 and the sequence deposited in GenBank under accession number ON077361. The  
122 BBTV isolate and aphid colony were kept in 32-mesh insect-proof screen cages under  
123 greenhouse conditions.

124 *Screening of wild Musa test plants for BBTV resistance.* Accessions from seeds had a  
125 total of 60 replicates while tissue cultured accessions had 25 replicates. A standard  
126 transmission protocol of BBTV was performed using aphids from a single colony and the  
127 BBTV reference isolate. Aphid transmission of BBTV followed the protocol of Thomas  
128 and Dietzgen (1991) with a few modifications (Dijkstra and Jager, 1998; Anhalt and  
129 Almeida, 2008). Wingless aphids were transferred into a sterilized closed container and  
130 starved for four hours. Starved aphids were then transferred to a banana cv. Lakatan  
131 plant infected with the BBTV reference isolate for an 18 to 24-hour acquisition access  
132 period (AAP). Twenty viruliferous aphids were then transferred to each test plant and  
133 allowed to feed for a 24 to 30-hour inoculation access period (IAP). Ten banana cv.  
134 Lakatan plants (dela Cruz et al., 2008) were used as positive controls per batch of

135 inoculations. Inoculated test plants were sprayed with insecticide to eliminate the aphids  
136 after the IAP. Samples were maintained inside an insect-proof or 32 mesh screen cage  
137 in greenhouse conditions and regularly observed for symptom appearance.

138 *Confirmation of resistance of wild banana accessions from greenhouse trial.* Wild  
139 banana accessions with 0% BBTD infection six months post-inoculation in greenhouse  
140 were then transferred to a field with high incidence of BBTD for further evaluation. Basic  
141 land preparation was performed such as mowing, plowing, rotavating and furrowing prior  
142 to transplanting. Wild *Musa* accessions were transplanted to the field per batch of  
143 screening. As a susceptible check, six-month-old virus-free banana cv. Lakatan plants  
144 were also planted parallel to test plants with the same number of replicates.

145 Screened *M. balbisiana* accessions in the field with suckers and producing  
146 bunches with viable seeds were subjected to re-screening against BBTV. The corms of  
147 the suckers of accessions 2016-018, 1998-087, 2016-013, 2013-155, 2016-051, 2016-  
148 003, and 2013-101 were macropropagated in large drums in an insect-proof cage and a  
149 total of four replicates per accession were screened against BBTV. On the other hand,  
150 seeds from accessions 2016-003, 2013-155, 2013-156, 1998-078, 1997-276 were  
151 harvested and grown in seedbeds. Fifteen seedlings per accession served as replicates.  
152 Test plants were inoculated with BBTV using the standard transmission protocol and  
153 monitored as outlined above. The trial was performed under greenhouse conditions.

154 *Detection of BBTV.* The presence of BBTV in test plants in the greenhouse was  
155 determined by PCR. Detection was conducted at three and six months after inoculation  
156 before proceeding to the field trial. Then, for accessions in the field, samples were taken  
157 from 10 randomly selected plants per *Musa* accession every six months from

158 transplanting. Leaf samples were taken from the second youngest leaf with portions of  
159 the midrib (Thomas et al., 1994). About 0.5g per sample was homogenized in a 100 ×  
160 150 mm polyethylene bag with a 3 mL extraction buffer (0.05 M Tris-HCl, 0.5% sodium  
161 sulfite, and 2.5% non-fat milk). One ml of leaf extract was transferred into a sterile 1.5 ml  
162 tube and centrifuged for 5 min at 10,000 rpm. The supernatant was used as a template  
163 for PCR assay targeting the DNA-R of BBTV using BBT1 and BBT2 primer pair  
164 (Thomson and Dietzgen 1991). Exactly 2 µl of template was added into a PCR cocktail  
165 containing 1x PCR buffer, 1.76 mM MgCl<sub>2</sub>, 0.2 mM dNTPs, 0.2 µM of forward BBT1 (3'  
166 CTCGTCATGTGCAAGGTTATGTCG 5') and reverse primer BBT2, (5'  
167 GAAGTTCTCCAGCTATTCATCGCC 3'), 1 U Taq DNA polymerase and DEPC water to  
168 attain a final volume of 15 µl. Samples were run in a Mycycler thermal cycler (Bio-  
169 Rad, USA) using the following PCR conditions: 94°C for 3 min, 35 cycles of 94°C for 30  
170 s, 56°C for 1 min and 72°C for 1 min, and a final extension of 3 min at 72°C. The  
171 presence of BBTV was indicated by the amplification of the 349 bp band visualized by  
172 gel electrophoresis with ethidium bromide staining. PCR assays were duplicated.

173

174

175

176

177

178

179

180



181 **Results**

182 Screening of wild *Musa* test plant accessions

183 The positive control banana cv. Lakatan was the first to show symptoms of BBTD.  
184 Marginal chlorosis and dark green streaks along midrib were observed between 15-21  
185 days after inoculation (DAI). Among wild banana accessions, only *M. acuminata* subsp.  
186 *errans* accessions, 2017-042 and 2021-029, expressed initial symptoms of BBTD at 21-  
187 28 DAI as shown in figure 2. By six weeks after inoculation, 100% disease incidence  
188 was recorded in *M. acuminata* subsp. *errans* showing confirmatory symptoms of BBTD  
189 such as dot and dash flecks, narrow and erect emerging leaves with marginal chlorosis  
190 and bunchy top. Meanwhile, none of the 34 *M. balbisiana* accessions showed any  
191 symptoms of the disease even at six-month post-inoculation (Figure 3). At three months  
192 post-inoculation, *M. acuminata* subsp. *errans* accessions and cv. Lakatan recorded a  
193 100% BBTV incidence based in PCR assays. All *M. balbisiana* entries were negative  
194 after repeated PCR assays as indicated in Table 2.

195

196 *Confirmation of resistance of wild M. balbisiana accessions (Field Trial).* All 34 Wild *M.*  
197 *balbisiana* accessions from seeds and tissue culture proceeded to the field trial. Healthy  
198 tissue-cultured banana cv. Lakatan plants were also planted along the rows of *M.*  
199 *balbisiana* accessions. As early as one month after transplanting, initial symptoms such  
200 as j-hook, chlorosis and dark green streaks along the midrib started to appear in cv.  
201 Lakatan plants. Symptoms of BBTD became severe with stunting, leaf narrowing, and  
202 bunchy top exhibited. Incidence of BBTV in control cv. Lakatan plants per batch of  
203 inoculation were indicated in table 2. *M. balbisiana* test plants did not show any

204 symptoms and continued to develop and produce suckers. Vigorous growth was noted  
205 even under high disease pressure as shown in in figure 4. Macropropagated plants  
206 (figure 5) and seedlings derived from field trial plants were also symptomless.

207           BBTV was not detected by PCR in any replicates of all *M. balbisiana* accessions  
208 from seeds (n=60) and tissue culture (n=25) that were collected from the field trial while  
209 all samples of cv. Lakatan test plants were positive for BBTv infection with 100%  
210 incidence at 3 months after inoculation based in PCR. Macropropagated suckers and  
211 seedling derivatives of accessions from field trial plants also tested negative for BBTv  
212 by PCR.

213 **Discussion**

214 BBTV causes the most destructive virus disease of bananas. The  
215 disease virtually eliminated smallholdings of banana cv. Lakatan in the Luzon  
216 region of the Philippines (Molina et al. 2009) and thus most banana produce of  
217 the Philippines now comes from the Mindanao region. The most common  
218 practice in controlling BBTV in Mindanao is with the use of clean, tissue-  
219 cultured plants (Molina et al. 2009). However, the use of virus-free planting  
220 materials alone does not guarantee total protection against BBTD, and on-  
221 going inspection and eradication programs are challenging to enact and  
222 expensive to run. An efficient and sustainable strategy for controlling virus  
223 diseases involves the use of resistant varieties. However, there are still no  
224 reported varieties of banana resistant to BBTD (Hooks et al. 2009). In this  
225 study, the potential of wild *Musa* spp. as natural sources of resistance against  
226 BBTV was assessed.

227 Although *M. acuminata* subsp. *errans* accessions were susceptible to  
228 BBTV infection with a 100% infection rate and the control banana cv. 'Lakatan'  
229 showed strong BBTD symptoms and a 100% incidence of BBTV by PCR, all  
230 34 *M. balbisiana* accessions showed no symptoms under greenhouse and  
231 field conditions. The virus was also not detected in *M. balbisiana* accessions  
232 by PCR after multiple rounds of screening. This study has revealed that wild *M.*  
233 *balbisiana* accessions from the Philippines are likely sources of resistance to  
234 BBTV. The lack of infection of the *M. balbisiana* accessions is unlikely to be  
235 due to lack of aphid feeding, as aphid survival numbers on the inoculated  
236 plants was high, and indeed some of these *M. balbisiana* accessions were  
237 used as maintenance hosts for the non-viruliferous aphid colonies.

238           Susceptibility of *Musa* cultivars has often been found to be related to  
239 genomic grouping, with cultivars containing a B genome component derived  
240 from *M. balbisiana* (BB) often showing a level of tolerance or resistance to  
241 BBTV (Ngatat et al., 2017; Jose; 1981, Muharam, 1984; Espino et al., 1993;  
242 Niyongere et al., 2011; Sachter-Smith, 2015; Hapsari and Masrum, 2012;  
243 Latifah et al., 2021). This association is not always consistent, however, and  
244 some A genome cultivars such as Gros Michel (AAA) show resistance to  
245 infection by BBTV while B genome-containing cultivars can vary markedly in  
246 their reaction (Niyongere et al., 2011; Ngatat et al., 2017; Magee, 1948). Thus,  
247 there may be several sources of resistance or tolerance to BBTV in *Musa*  
248 germplasm. The results presented here support the hypothesis that a source  
249 of resistance to BBTV is present in the B genome of wild *M. balbisiana* and  
250 that it has been transferred to many edible cultivars that contain a proportion  
251 of B genome. However, chromosome structural changes including  
252 translocations are known within wild banana species and in edible  
253 interspecific hybrids (Šimoníková et al 2022), so it is likely that resistance  
254 genes present on a chromosome in one cultivar may not be present in the  
255 same chromosome of another. The source of resistance describe in this work  
256 appears to be widely distributed in *M. balbisiana* from the Philippines.

257           The centre of origin for *M. balbisiana* is thought to range from north-  
258 east India, the northern limits of south-east Asia, southern China, to the  
259 Philippines (Perrier et al, 2009), though presence in the Philippines may be as  
260 feral populations introduced by humans (De Langhe et al 2015). Interestingly  
261 the centre of origin for the BBTV pathosystem where the maximum degree of  
262 BBTV diversity is found (Rao et al., 2017; Stainton et al., 2015) also coincides

263 with this region. One would expect that resistance to BBTV may have also  
264 evolved here.

265 Although the BBTV-resistant wild *M. balbisiana* from the Philippines are  
266 seeded, and thus not directly suitable as an edible banana, they have  
267 alternative uses. Filipinos prefer the flower bud of wild *M. balbisiana* rather  
268 than cultivated bananas in cooking. Its thick and green leaves are also  
269 marketed in the region for culinary purposes.

270 Breeding of banana continues with the goal of incorporating resistance  
271 to diseases, abiotic stresses and other desirable morphological traits (Wilson  
272 et al. 2020). A widely used scheme in banana breeding today is the crossing  
273 of triploid and diploid banana ( $3\times/2\times$ ) followed by tetraploid and diploid or  
274  $4\times/2\times$  (Jenny 2002; Vezina 2014). *M. balbisiana* accessions can be used as  
275 parents for conventional breeding and hand pollinated bunches can produce  
276 over 40,000 seeds per bunch. *M. balbisiana* is recognized as a source of  
277 useful traits within *Musa* including vigorous growth, strong suckering, drought  
278 tolerance and resistance to abiotic stresses (Bakry et al 2021).

279 With the use of current molecular tools, investigation on molecular  
280 mechanisms of resistance in wild *M. balbisiana* accessions can be conducted  
281 (Solomon-Blackburn & Barker 2001; Sharma et al. 2018). The findings of the  
282 present study have led to the implementation of a local research project on  
283 fast-tracking the development of BBTV-resistant banana cultivars using  
284 modern biotechnology tools. A next-generation sequencing strategy (RNA-seq)  
285 is currently being performed to find alleles related to BBTD resistance.

286 Discoveries will be further applied in assisting DNA marker development to aid  
287 the ultimate development of genetically modified resistant bananas.

288

289

290

## 291 **Conclusion**

292 Thirty four wild *M. balbisiana* (BBw) accessions exhibited total  
293 resistance to BBTv as shown by the absence of symptoms and negative  
294 molecular detection of BBTv under greenhouse and field evaluation. The  
295 study confirms that resistance against BBTd exists in the wild ecosystem and  
296 provides a solid base for future efforts to produce BBTv-resistant banana  
297 cultivars. These accessions could be used as a source of resistance for  
298 conventional breeding of BBTv-resistant hybrids. The use of molecular tools  
299 to investigate the genetic aspect of resistance in these accessions could lead  
300 to applications such as marker assisted breeding and incorporation of  
301 resistance genes through transgenic approaches.

## 302 **Acknowledgments**

303 This work was supported by the Bill & Melinda Gates Foundation [Grant  
304 Number INV-010652]. Under the grant conditions of the Foundation, a  
305 Creative Commons Attribution 4.0 Generic License has already been  
306 assigned to the Author Accepted Manuscript version that might arise from this  
307 submission. We thank Mr. Rodelio Pia, Mr. Valentino L. Garcia, Mr. Joey A.  
308 Ancheta, Ms. Rizalina L. Tiongco, Ms. Vangelene T. Linga, Ms. Elaine Anne L.

309 Elmido and Mr. Jay-Vee S. Mendoza from Plant Pathology Laboratory and Mr.  
310 Jerome Lopez, Ms. Maria B. Adisaz and Ms. Jovy Marie Cezar from the  
311 National Plant Genetic Resources Laboratory of the Institute of Plant Breeding,  
312 College of Agriculture and Food Science, University of the Philippines Los  
313 Baños for their technical assistance and moral support throughout the study.

314

## 315 **References**

316 Aguilar, E.A., Dela Cruz, Jr., F.S., Dizon, T.O., Artes, L.A., Gueco, L.S.,  
317 Calara, M.C.J., and Cañas, J.A.F., 2010. Mga Rekomendadong Teknolohiya  
318 sa Pag-aalaga ng Saging na Saba, Lakatan at Latundan. University of the  
319 Philippines, Los Baños, Laguna, Philippines.

320 Anhalt, M.D., and Almeida, R.P.P., 2008. Effect of Temperature, Vector Life  
321 Stage, and Plant Access Period on Transmission of Banana bunchy top virus  
322 to Banana. *Phytopathol.* 98, 743-748. 10.1094/phyto-98-6-0743.

323 Bakry F., Horry J-P., Jenny C., 2021. Making banana breeding more effective.  
324 In: Kema G, Drenth A, eds. Achieving sustainable cultivation of bananas;  
325 Volume 2 Germplasm and genetic improvement. Cambridge, UK: Burleigh  
326 Dodds Science Publishing, pp. 217-55. 10.19103/AS.2020.0070

327 Borth, W., Perez, E., Cheah, K., Chen, Y., Xie, W. S., Gaskill, D., Khalil, S.,  
328 Sether, D., Melzer, M., Wang, M., Manshardt, R., Gonsalves, D., and Hu, J. S,  
329 2011. Transgenic banana plants resistant to banana bunchy top virus infection.  
330 *Acta Hortic.* 449-457. <https://doi.org/10.17660/actahortic.2011.897.61>.

331 De Langhe E., Perrier X., Donohue M., Denham T., 2015. The Original  
332 Banana Split: Multi-disciplinary implications of the generation of African and

333 Pacific Plantains in Island Southeast Asia. *Ethnobot Res Appl.* 14, 299-312.

334 10.17348/era.14.0.299-312

335 Dela Cruz Jr., F.S., Gueco, L.S., Damasco, O.P., Huelgas, V.C., dela Cueva,  
336 F.M., Dizon, T.O., Sison, M.L.J., Banasihan, I.G., Sinohin, V.O., and Molina Jr.,  
337 A.B., 2008. Farmer's handbook on introduced and local banana cultivars in  
338 the Philippines. Bioversity International. p 67.

339 Dela Cueva, F. M., Silva, F.F.M.A., Molina Jr., A.B., 2015. Banana bunchy top.  
340 In: Dela Cueva, F. M., Pascual, C.B., Bajet, C.M., Dalisay, T. U. (ed). Pests  
341 and Diseases of Economically Important Crops in the Philippines. Pest  
342 Management Council of the Philippines, Inc. University of the Philippines Los  
343 Baños, College, Laguna.

344 Dellaporta, S. L., Wood, J., Hicks, J.B., 1983. A plant DNA miniprep: preparation  
345 Version II. *Plant Mol Biol Rep.* 1: 19-21.

346 Dijkstra, J., and Jager, C. D., 1998. Virus Transmission by Aphids. In:  
347 Practical Plant Virology Protocols and Exercises. Springer Berlin.

348 Doyle, J.J., Doyle, J.L., 1987. A rapid DNA isolation procedure for small  
349 quantities of fresh leaf tissue. *Phytochem Bullet.* 19, 11-15.

350 Elayabalan, S., Kalaiponmani, K., Subramaniam, S., Selvarajan, R.,  
351 Panchanathan, R., Muthuvelayoutham, R., Kumar, K. & Balasubramanian, P.,  
352 2013. Development of Agrobacterium-mediated transformation of highly  
353 valued hill banana cultivar Virupakshi (AAB) for resistance to BBTV disease.  
354 *World J Microbiol Biotechnol.* 29, 589-596. 10.4172/2169-0111.1000114

355 Espino, R.C., Magnaye, L.V., Johns, A.P., Juanillo, C. 1993. Evaluation of  
356 Philippine banana cultivars for resistance to bunchy-top and fusarium wilt. pp.



- 357 89-102. In: Valmayor RV, Hwang SC, Ploetz R, Lee SC, Roa NV (eds.)  
358 Proceedings: International Symposium on Recent Developments in Banana  
359 Cultivation Technology, 14-18 December 1992, Chiuju, Pingtung, Taiwan.  
360 Taiwan Banana Research Institute, INIBAP/ASPNET, Los Banos, Philippines.
- 361 Hapsari, L. & Masrum, A., 2012. Preliminary screening resistance of Musa  
362 germplasms for Banana Bunchy Top Disease in Purwodadi Botanic Garden,  
363 Pasuruan, East Java. Buletin Kebun Raya, 15, 57-70.
- 364 Harding, R.M., Burns. T.M., and Dale, J.L., 1991. Virus-like particles  
365 associated with banana bunchy top disease contain small single-stranded  
366 DNA. J Gen Virol. 72: 225-230. 10.1099/0022-1317-72-2-225.
- 367 Harish, S., Kavino, M., Kumar, N., and Samiyappan, R., 2009. Biopriming  
368 banana with plant growth-promoting endophytic bacteria induces systemic  
369 resistance against banana bunchy top virus. Acta Hort. 828: 295-302.  
370 10.17660/actahortic.2009.828.30.
- 371 Hebert, P.D.N., Penton, E.H., Burns, J.M., Janzen, D.H., Hallwachs, W., 2004.  
372 Ten species in one: DNA barcoding reveals cryptic species in the neotropical  
373 skipper butterfly *Astraptes fulgerator*. Proceedings of the National Academy of  
374 Sciences of the United States of America 101: 14812-14817.
- 375 Hooks, C. R. R., Manandhar, R., Perez, E. P., Wang, K.-H., and Almeida, R. P.  
376 P., 2009. Comparative Susceptibility of Two Banana Cultivars to Banana  
377 Bunchy Top Virus Under Laboratory and Field Environments. J Econ Entomol.  
378 102, 897-904. 10.1603/029.102.0306.

- 379 Islam, N., Naqvi, A., Jan, A. T. Haq, Q. 2010. Genetic diversity and possible  
380 evidence of recombination among Banana Bunchy Top Virus (BBTV) isolates.  
381 Int Res J Microbiol. 1, 1-12.
- 382 Jose, P. C., 1981. Reaction of different varieties of banana against bunchy top  
383 disease. Agric Res J Kerala. 19, 108-110.
- 384 Jebakumar, R. M. & Selvarajan, R., 2018. Biopriming of micropropagated  
385 banana plants at pre- or post-BBTV inoculation stage with rhizosphere and  
386 endophytic bacteria determines their ability to induce systemic resistance  
387 against BBTV in cultivar Grand Naine. Biocontrol Sci Technol. 28, 1074-1090.  
388 10.1080/09583157.2018.1514583
- 389 Jenny, C., Tomekpe, K., Bakry, F., and Escalant, J. V., 2002. Conventional  
390 Breeding of Bananas. In: Jacome, L., Lepoivre, P., Marin, D., Ortiz, R.,  
391 Romero R., and Escalant J.V. (Eds.). *Mycosphaerella leaf spot diseases of  
392 bananas: Present status and outlook. essay, International Network for the  
393 Improvement of Banana and Plantain*, pp. 199-208.
- 394 Kavino, M., Harish, S., Kumar, N., Saravanakumar, D., and Samiyappan, R.,  
395 2007. Induction of systemic resistance in banana (*Musa spp.*) against banana  
396 bunchy top virus (BBTV) by combining chitin with root-colonizing  
397 *Pseudomonas fluorescens* strain CHA0. Eur J Plant Pathol. 120, 353-362.  
398 10.1007/s10658-007-9223-8.
- 399 Latifah, Hidayat, S. H., Mutaqin, K. H., Widodo & Sutanto, A. 2021. Survey of  
400 Banana bunchy top virus on non-cultivated bananas in West Java. IOP  
401 Conference Series: Earth and Environmental Science. 694, 012044.  
402 10.1088/1755-1315/694/1/012044.

- 403 Magee, C.J.P., 1948. Transmission of bunchy top to banana varieties. *J Aust*  
404 *Inst Agric Sci.* 14, 18-24.
- 405 Molina A. B., Sinohin V. G. O., dela Cueva F. M., Dela Esguerra A. V., Crucido  
406 S. S., Vida E., Temanel B.E., Anit E.A., Eusebio J.E., 2009. Managing banana  
407 bunchy top virus in smallholdings in the Philippines. *Acta Hortic.* 828, 383-387.  
408 10.17660/ActaHortic.2009.828.39.
- 409 Mpoki, S., Mahuku, G., Mbanzibwa, D.R., et al., 2021. First report of banana  
410 bunchy top virus in banana and plantain (*Musa* spp.) in Tanzania. *Plant Dis in*  
411 *press.* 10.1094/pdis-07-21-1387-pdn
- 412 Muharam, A., 1984. Test for resistance of some banana cultivars to banana  
413 bunchy-top disease. *Bulletin Penelitian Hortikultura.* 11, 16-19.
- 414 Mware, B. O., 2016. Development of banana bunchy top virus resistance in  
415 bananas: Rnai approach. PhD, Queensland University of Technology.
- 416 Niyongere, C., Ateka, E., Losenge, T., Blomme, G., and Lepoint, P. 2011.  
417 Screening *Musa* Genotypes for Banana Bunchy Top Disease Resistance In  
418 Burundi. *Acta Hortic.* 897, 439-447. 10.17660/actahortic.2011.897.60.
- 419 Ngatat, S., Hanna, R., Kumar, P. L., Gray, S. M., Cilia, M., Ghogomu, R. T. &  
420 Fontem, D. A., 2017. Relative susceptibility of *Musa* genotypes to banana  
421 bunchy top disease in Cameroon and implication for disease management.  
422 *Crop Prot.* 101, 116-122. 10.1016/j.cropro.2017.07.018
- 423 Ocimati, W., Tazuba, A.F., Tushemereirwe, W.K., Tugume, J., Omondi, B.A.,  
424 Acema, D. et al. 2021. First report of banana bunchy top disease caused by

- 425 Banana bunchy top virus in Uganda. *New Dis Rep.* 44, e12052.  
426 10.1002/ndr2.12052
- 427 Ortiz R., 2013. Conventional Banana and Plantain Breeding. *Acta Hortic.* 986,  
428 177-194. 10.17660/actahortic.2013.986.19.
- 429 Parna Bhadra, B. K. Agarwala, A comparison of fitness characters of two host  
430 plant-based congeneric species of the banana aphid, *Pentalonia nigronervosa*  
431 and *P. caladii*. *J Insect Sci.* 10, 140. <https://doi.org/10.1673/031.010.14001>.
- 432 Perrier, X., 2009. Combining biological approaches to shed light on the  
433 evolution of edible bananas. *Ethnobot Res and Appl.* 7, 199-216.
- 434 Qazi, J., 2015. Banana bunchy top virus and the bunchy top disease. *J Gen*  
435 *Plant Pathol.* 82, 2-11. 10.1007/s10327-015-0642-7.
- 436 Rao, X. Q., Wu, Z. L., Zhou, L., Sun, J. & Li, H. P., 2017. Genetic diversity of  
437 banana bunchy top virus isolates from China. *Acta Virol.* 61, 217-222.  
438 10.4149/av\_2017\_02\_13.
- 439 Sachter-Smith, G. L., 2015. In search of naturally occurring host resistance to  
440 Banana bunchy top virus. Master of Science Master of Science, University of  
441 Hawai'i at Mānoa.
- 442 Sharma, M., Tarafdar, A., Chandran, S., Chobe, D., and Ghosh, R., 2018.  
443 Molecular markers as tools for identification and introgression of virus-  
444 resistant genes. 10.21775/9781910190814.04.
- 445 Shekhawat, U. K., Ganapathi, T. R., and Hadapad, A. B., 2012. Transgenic  
446 banana plants expressing small interfering RNAs targeted against viral

- 447 replication initiation gene display high-level resistance to banana bunchy top  
448 virus infection. *J Gen Virol.* 93, 1804-1813. 10.1099/vir.0.041871-0.
- 449 Šimoníková, D.; Cížková, J.; Zoulová, V.; Christelová, P.; Hřibová, E.  
450 Advances in the Molecular Cytogenetics of Bananas, Family Musaceae Plants.  
451 2022. 11, 482. <https://doi.org/10.3390/plants11040482>.
- 452 Solomon-Blackburn, R., and Barker, H., 2001. Breeding virus resistant  
453 potatoes (*Solanum tuberosum*): a review of traditional and molecular  
454 approaches. *Heredity.* 86, 17-35. [https://doi.org/10.1046/j.1365-](https://doi.org/10.1046/j.1365-2540.2001.00799.x)  
455 2540.2001.00799.x.
- 456 Stainton, D., Kraberger, S., Walters, M., Wiltshire, E. J., Rosario, K., Halafihi,  
457 M. I., Lolohea, S., Katoa, I., Faitua, T. A. H., Aholelei, W., Taufu, L., Thomas, J.  
458 E., Collings, D. A., Martin, D. P. & Varsani, A. 2012. Evidence of inter-  
459 component recombination, intra-component recombination and reassortment  
460 in banana bunchy top virus. *J Gen Virol.* 93, 1103-1119.  
461 10.1099/vir.0.040337-0.
- 462 Thomas, J. E., and Dietzgen, R. G., 1991. Purification, characterization, and  
463 serological detection of virus-like particles associated with banana bunchy top  
464 disease in Australia. *J Gen Virol.* 72, 217-224. 10.1099/0022-1317-72-2-217.
- 465 Thomas, J.E., Iskra-Caruana, M.L., and Jones, D.R., 1994. Banana bunchy  
466 top disease. *Musa Disease Fact Sheet No. 4.* International Network for the  
467 Improvement of banana and plantain (INIBAP). Montpellier, pp 2.
- 468 Thomas, J.E., 2008. Banana bunchy top virus. In: Mahy BWJ, Regenmortel  
469 MHVV (eds) *Encyclopedia of Virology.* Elsevier, Oxford, pp 272-279  
470 Thomas, J.E. and Iskra-Caruana, M.L., 2000. Diseases caused by viruses. In: Jones,

- 471 D.R. (ed.). Diseases of banana, Abacá and Enset. CABI, Wallingford (GBR).  
472 pp. 241-293.
- 473 Thomas, J.E., 2019. Banana bunchy top. In: Jones D, ed. Handbook of  
474 Diseases of Banana, Abacá and Enset. Wallingford, Oxfordshire, UK: CAB  
475 International, pp 362-76.
- 476 Thomson, D., and Dietzgen, R. G., 1995. Detection of DNA and RNA plant  
477 viruses by PCR and RT-PCR using a rapid virus release protocol without  
478 tissue homogenization. J Virol Methods. 54, 85-95.
- 479 Valmayor, R.V., Espino, R.R.C., Pascua, O.C., 2002. The wilds and cultivated  
480 bananas of the Philippines. Los Baños, Laguna: PARFI and BAR.
- 481 Venkataramana, R.K., Sampangi-Ramaiah, M.H., Ajitha, R., Khadke, G.N.,  
482 Chellam, V., 2015. Insights into *Musa balbisiana* and *Musa acuminata* species  
483 divergence and development of genic microsatellites by transcriptomics  
484 approach. Plant Gene. 4: 78-82. 10.1016/j.plgene.2015.09.007
- 485 Vézina, A. (2014, August 7). Who's breeding bananas? Retrieved from  
486 <https://www.promusa.org/blogpost363-Who-s-breeding-bananas>.
- 487 Wilson, V., Tenkouano, A., Swennen, R., Crouch, H., Gauhl, F., Gauhl, P.,  
488 Ortiz, R., Vuylsteke, D., Crouch, J., and Austin, P., 2020. Ten Year  
489 Progression of *Musa* Breeding from 1987 to 1997: 1. Pollination Success and  
490 Seed Production (Fecundity) Patterns among Multiple Ploidy Crosses. Asian  
491 Journal of Research in Botany 4, 53.
- 492 Xie, W., Hu, J.S. 1995. Molecular Cloning, Sequence Analysis, and Detection  
493 of Banana Bunchy Top Virus in Hawaii. Phytopathol. 85, 339. 10.1094/phyto-  
494 85-33

495 **Conflict of Interests**

496 The authors declare that they have no conflict of interests.

497

498

499 **Ethical Approval**

500 This article does not contain any studies with human and animal participations

501 performed by the authors

502 Table 1. List of wild *Musa* accessions screened from germplasm collection of NPGRL-IPB

| Plant Source Type | GB/ PHL Number | Collection Number | Local name  | Scientific name        | Collection Site  |
|-------------------|----------------|-------------------|-------------|------------------------|------------------|
| Seeds             | GB24350        | 1997-276          | Butuhan     | <i>Musa balbisiana</i> | Zambales         |
| Seeds             | GB24364        | 1998-078          | Butuhan     | <i>Musa balbisiana</i> | Quirino          |
| Seeds             | GB24366        | 1998-085          | Butuhan     | <i>Musa balbisiana</i> | Quirino          |
| Seeds             | GB24376        | 1998-315          | Pik-iw      | <i>Musa balbisiana</i> | Marinduque       |
| Seeds             | GB24376        | 1998-315 H2       | Pik-iw      | <i>Musa balbisiana</i> | Marinduque       |
| Seeds             | GB24405        | 1998-453          | Butuhan     | <i>Musa balbisiana</i> | Ilocos Norte     |
| Seeds             |                | 1998-456          | Balibisiana | <i>Musa balbisiana</i> | Ilocos Sur       |
| Seeds             | GB24421        | 1998-575          | Butuhan     | <i>Musa balbisiana</i> | Leyte            |
| Seeds             | GB24442        | 1998-633          | Pik-iw      | <i>Musa balbisiana</i> | Quezon           |
| Seeds             | PHL32673       | 2010-047          | Balbisiana  | <i>Musa balbisiana</i> | Oriental Mindoro |
| Seeds             | GB61941        | 2013-100          | Pakol       | <i>Musa balbisiana</i> | Catanduanes      |



503 Table 1. List of wild *Musa* accessions screened from germplasm collection of NPGRL-IPB

| Plant Type | GB/ PHL Number | Collection Number | Local name      | Scientific name        | Collection Site  |
|------------|----------------|-------------------|-----------------|------------------------|------------------|
| Seeds      | GB61941        | 2013-100 H2       | Moko            | <i>Musa balbisiana</i> | Catanduanes      |
| Seeds      | GB61942        | 2013-101          | Butuhan         | <i>Musa balbisiana</i> | Catanduanes      |
| Seeds      | GB61996        | 2013-155          | Moko-Bulo       | <i>Musa balbisiana</i> | Camarines Sur    |
| Seeds      | GB61996        | 2013-155 H2       | Moko            | <i>Musa balbisiana</i> | Camarines Sur    |
| Seeds      | GB61997        | 2013-156          | Butuhan         | <i>Musa balbisiana</i> | Camarines Sur    |
| Seeds      | GB62000        | 2013-159          | Moko            | <i>Musa balbisiana</i> | Camarines Norte  |
| Seeds      | GB66554        | 2016-003          | Pik-ew/ Butuhan | <i>Musa balbisiana</i> | Agusan del Norte |
| Seeds      | GB66560        | 2016-013          | Balbisiana      | <i>Musa balbisiana</i> | Oriental Mindoro |
| Seeds      | GB66565        | 2016-018          | Balbisiana      | <i>Musa balbisiana</i> | Agusan del Norte |
| Seeds      | GB66565        | 2016-018          | Balbisiana      | <i>Musa balbisiana</i> | Agusan del Norte |
| Seeds      | GB66583        | 2016-048 H1       | Pakol           | <i>Musa balbisiana</i> | Albay            |

504 Table 1. List of wild *Musa* accessions screened from germplasm collection of NPGRL-IPB

| Plant Source Type | GB/ PHL Number | Collection Number | Local name  | Scientific name                             | Collection Site |
|-------------------|----------------|-------------------|-------------|---------------------------------------------|-----------------|
| Seeds             | GB66586        | 2016-051          | Butuhan     | <i>Musa balbisiana</i>                      | Camarines Sur   |
| Seeds             | GB66586        | 2016-051 H1       | Butuhan     | <i>Musa balbisiana</i>                      | Camarines Sur   |
| Seeds             | GB66586        | 2016-051 H2       | Butuhan     | <i>Musa balbisiana</i>                      | Camarines Sur   |
| Seeds             | GB66587        | 2016-052          | Balibisiana | <i>Musa balbisiana</i>                      | Camarines Sur   |
| Seeds             | GB66588        | 2016-053          | Balibisiana | <i>Musa balbisiana</i>                      | Camarines Sur   |
| Seeds             | GB66591        | 2016-056 H3       | Balbisiana  | <i>Musa balbisiana</i>                      | Camarines Norte |
| Seeds             | GB66592        | 2016-057          | Balibisiana | <i>Musa balbisiana</i>                      | Camarines Norte |
| Seeds             | GB66592        | 2016-057 H2       | Moko        | <i>Musa balbisiana</i>                      | Camarines Norte |
| Seeds             | GB66648        | 2017-040          | Balbisiana  | <i>Musa balbisiana</i>                      | Quezon          |
| Seeds             | GB67532        | 2017-042          | Agutay      | <i>M. acuminata</i><br><i>subsp. errans</i> | Laguna          |
| Seeds             | GB67541        | 2017-048          | Pik-iw      | <i>Musa balbisiana</i>                      | Quezon          |

505 Table 1. List of wild *Musa* accessions screened from germplasm collection of NPGRL-IPB

| Plant Source Type | GB/ PHL Number | Collection Number | Local name | Scientific name                             | Collection Site |
|-------------------|----------------|-------------------|------------|---------------------------------------------|-----------------|
| Seeds             | GB67548        | 2017-055          | Balbisiana | <i>Musa balbisiana</i>                      | Quezon          |
| Seeds             | GB 71332       | 2021-029          | Agutay     | <i>M. acuminata</i><br><i>subsp. errans</i> | Laguna          |
| Tissue culture    |                | 1999-058          | Butuhan    | <i>Musa balbisiana</i>                      | Laguna          |
| Tissue culture    |                | 1999-088          | Butuhan    | <i>Musa balbisiana</i>                      | Davao Del Sur   |

506

507

508

509

510

511

512

513

514 Table 2. Result of greenhouse and field screening of wild banana against BBTV

| Collection Number           | Scientific name                                     | Source             | Greenhouse<br>BBTV % Infection | Field<br>BBTV % Infection | Location in the field            |
|-----------------------------|-----------------------------------------------------|--------------------|--------------------------------|---------------------------|----------------------------------|
| <u>Batch 1 and 2</u>        |                                                     |                    |                                |                           |                                  |
| 2013-155                    | <i>Musa balbisiana</i>                              | Seeds              | 0                              | 0                         | Plot 1                           |
| 2016-003                    | <i>Musa balbisiana</i>                              | Seeds              | 0                              | 0                         | Plot 1                           |
| 2013-159                    | <i>Musa balbisiana</i>                              | Seeds              | 0                              | 0                         | Plot 2                           |
| 2016-051                    | <i>Musa balbisiana</i>                              | Seeds              | 0                              | 0                         | Plot 2                           |
| Positive Control<br>Lakatan | <i>M. acuminata</i>                                 | Tissue<br>Cultured | 100%                           | 100%                      | n/a (100%*)                      |
| <u>Batch 3</u>              |                                                     |                    |                                |                           |                                  |
| 2013-101                    | <i>Musa balbisiana</i>                              | Seeds              | 0                              | 0                         | Plot 3                           |
| 2013-156                    | <i>Musa balbisiana</i>                              | Seeds              | 0                              | 0                         | Plot 3                           |
| 2017-040                    | <i>Musa balbisiana</i>                              | Seeds              | 0                              | 0                         | Plot 3                           |
| 2017-042                    | <b><i>M. acuminata</i><br/><i>subsp. errans</i></b> | <b>Seeds</b>       | <b>100%</b>                    | <b>NT**</b>               | <b>Greenhouse Trial<br/>only</b> |
| Positive Control<br>Lakatan | <i>M. acuminata</i>                                 | Tissue<br>Cultured | 100%                           | 100%                      | n/a (100%*)                      |
| <u>Batch 4</u>              |                                                     |                    |                                |                           |                                  |
| 1998-085                    | <i>Musa balbisiana</i>                              | Seeds              | 0                              | 0                         | Plot 4                           |
| 1998-315                    | <i>Musa balbisiana</i>                              | Seeds              | 0                              | 0                         | Plot 4                           |
| Positive Control<br>Lakatan | <i>M. acuminata</i>                                 | Tissue<br>Cultured | 100%                           | 100%                      | n/a (100%*)                      |

515 \*% Mortality rate \*\*NT- Not tested

516 Table 2. Result of greenhouse and field screening of wild banana test plants against BBTV (Continuation...)

| Collection Number        | Scientific name        | Source          | Greenhouse<br>BBTV % Infection | Field<br>BBTV % Infection | Location in the field |
|--------------------------|------------------------|-----------------|--------------------------------|---------------------------|-----------------------|
| <u>Batch 5</u>           |                        |                 |                                |                           |                       |
| 1999-088                 | <i>Musa balbisiana</i> | Tissue Cultured | 0                              | 0                         | Plot 5                |
| 1998-058                 | <i>Musa balbisiana</i> | Tissue Cultured | 0                              | 0                         | Plot 5                |
| 2010-047                 | <i>Musa balbisiana</i> | Seeds           | 0                              | 0                         | Plot 5                |
| 2016-013                 | <i>Musa balbisiana</i> | Seeds           | 0                              | 0                         | Plot 5                |
| 2016-018                 | <i>Musa balbisiana</i> | Seeds           | 0                              | 0                         | Plot 5                |
| 1998-078                 | <i>Musa balbisiana</i> | Seeds           | 0                              | 0                         | Plot 5                |
| Positive Control Lakatan | <i>M. acuminata</i>    | Tissue Cultured | 100%                           | 100%                      | n/a (100%*)           |
| <u>Batch 6</u>           |                        |                 |                                |                           |                       |
| 2016-052                 | <i>Musa balbisiana</i> | Seeds           | 0                              | 0                         | Plot 6                |
| 2016-018                 | <i>Musa balbisiana</i> | Seeds           | 0                              | 0                         | Plot 6                |
| 1997-276                 | <i>Musa balbisiana</i> | Seeds           | 0                              | 0                         | Plot 6                |
| Positive Control Lakatan | <i>M. acuminata</i>    | Tissue Cultured | 100%                           | 100%                      | n/a (100%*)           |
| <u>Batch 7</u>           |                        |                 |                                |                           |                       |
| 2016-048 H1              | <i>Musa balbisiana</i> | Seeds           | 0                              | 0                         | Plot 7                |
| 2016-051 H1              | <i>Musa balbisiana</i> | Seeds           | 0                              | 0                         | Plot 7                |
| 1998-633                 | <i>Musa balbisiana</i> | Seeds           | 0                              | 0                         | Plot 7                |
| Positive Control Lakatan | <i>M. acuminata</i>    | Tissue Cultured | 100%                           | 100%                      | n/a (43%*)            |

517 \*% Mortality rate

518

519

520 Table 2. Result of greenhouse and field screening of wild banana test plants against BBTV (Continuation...)

| Collection Number        | Scientific name        | Source             | Greenhouse<br>BBTV % Infection | Field<br>BBTV % Infection | Location in the field |
|--------------------------|------------------------|--------------------|--------------------------------|---------------------------|-----------------------|
| <b>Batch 8</b>           |                        |                    |                                |                           |                       |
| 2013-155 H2              | <i>Musa balbisiana</i> | Seeds              | 0                              | 0                         | Plot 8                |
| 2016-056 H3              | <i>Musa balbisiana</i> | Seeds              | 0                              | 0                         | Plot 8                |
| 1998-315 H2              | <i>Musa balbisiana</i> | Seeds              | 0                              | 0                         | Plot 8                |
| 1998-575                 | <i>Musa balbisiana</i> | Seeds              | 0                              | 0                         | Plot 8                |
| 2013-100                 | <i>Musa balbisiana</i> | Seeds              | 0                              | 0                         | Plot 8                |
| 2016-051 H2              | <i>Musa balbisiana</i> | Seeds              | 0                              | 0                         | Plot 8                |
| Positive Control Lakatan | <i>M. acuminata</i>    | Tissue<br>Cultured | 100%                           | 100%                      | Plot 8 (50%*)         |

521 \*% Mortality rate

522

523

524

525

526

527

528

529

530

531

532

533

534

535

536 Table 2. Result of greenhouse and field screening of wild banana test plants against BBTV (Continuation...)

| Collection Number        | Scientific name                                     | Source             | Greenhouse<br>BBTV % Infection | Field<br>BBTV % Infection | Location in the field            |
|--------------------------|-----------------------------------------------------|--------------------|--------------------------------|---------------------------|----------------------------------|
| <b>Batch 9</b>           |                                                     |                    |                                |                           |                                  |
| 2017-055                 | <i>Musa balbisiana</i>                              | Seeds              | 0                              | 0                         | Plot 9                           |
| 2013-100 H2              | <i>Musa balbisiana</i>                              | Seeds              | 0                              | 0                         | Plot 9                           |
| 2016-057 H2              | <i>Musa balbisiana</i>                              | Seeds              | 0                              | 0                         | Plot 9                           |
| 1998-453                 | <i>Musa balbisiana</i>                              | Seeds              | 0                              | 0                         | Plot 9                           |
| 2016-053                 | <i>Musa balbisiana</i>                              | Seeds              | 0                              | 0                         | Plot 9                           |
| 2017-048                 | <i>Musa balbisiana</i>                              | Seeds              | 0                              | 0                         | Plot 9                           |
| 1998-456                 | <i>Musa balbisiana</i>                              | Seeds              | 0                              | 0                         | Plot 9                           |
| <b>2021-029</b>          | <b><i>M. acuminata</i><br/><i>subsp. errans</i></b> | <b>Seeds</b>       | <b>100%</b>                    | <b>NT**</b>               | <b>Greenhouse Trial<br/>only</b> |
| Positive Control Lakatan | <i>M. acuminata</i>                                 | Tissue<br>Cultured | 100%                           | 100%                      | Plot 9                           |

537 \*% Mortality rate \*\*NT- Not tested

538

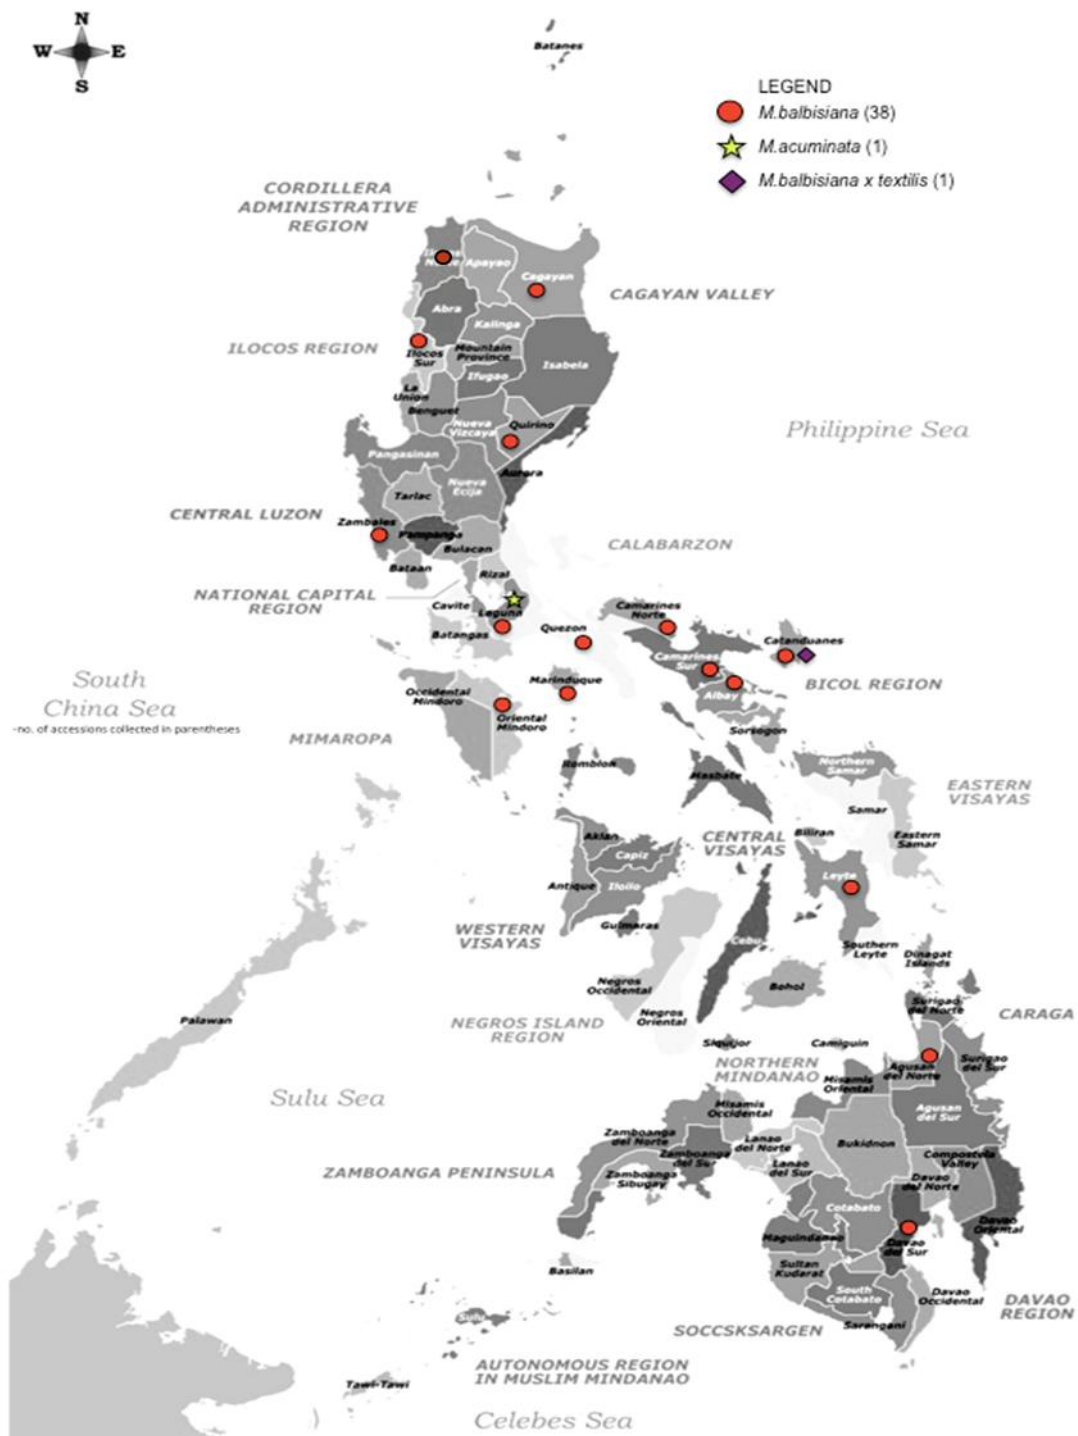

539

540

541 Figure 1. Philippine map showing the places of collection (in red dots) of

542 different *Musa balbisiana* accessions.



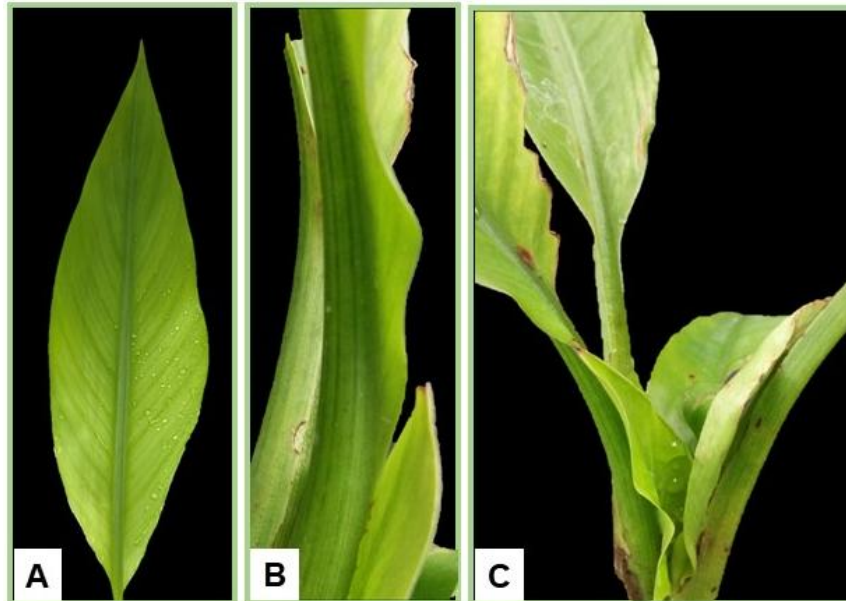

543

544 Figure 2. BBTV symptoms on 'Agutay' (*M. acuminata* ssp. *errans*): (a)

545 chlorosis on young leaves, (b) dot and dash flecks from midrib to

546 petiole (c) bunchy top

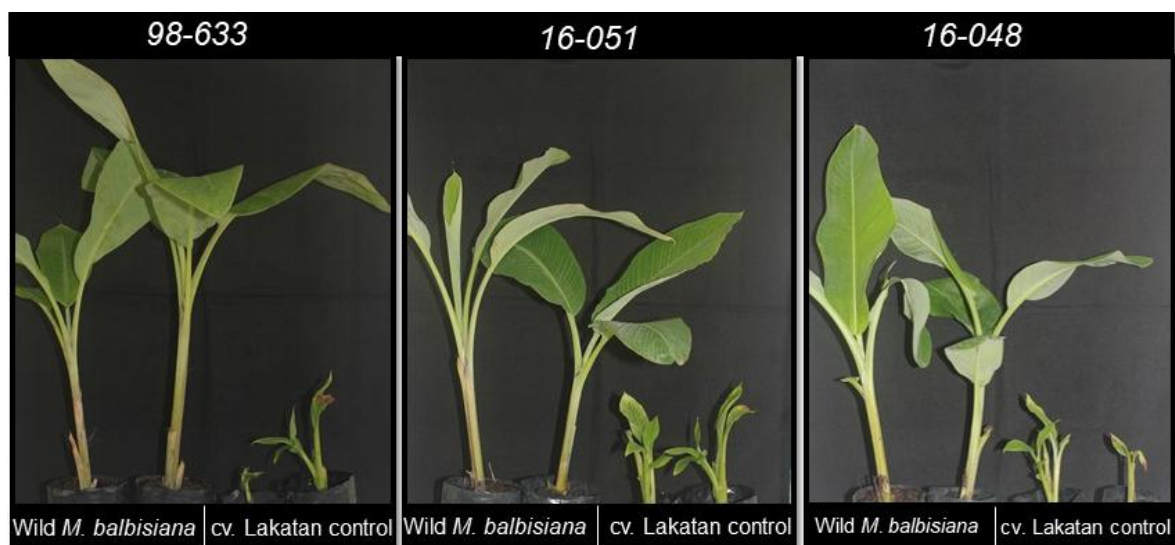

547

548 Figure 3. Asymptomatic *M. balbisiana* (MB) accessions 1998-633 (a), 2016-

549 051 (b), and 2016-048 (c) in comparison with the susceptible control

550 banana cv. Lakatan (right).

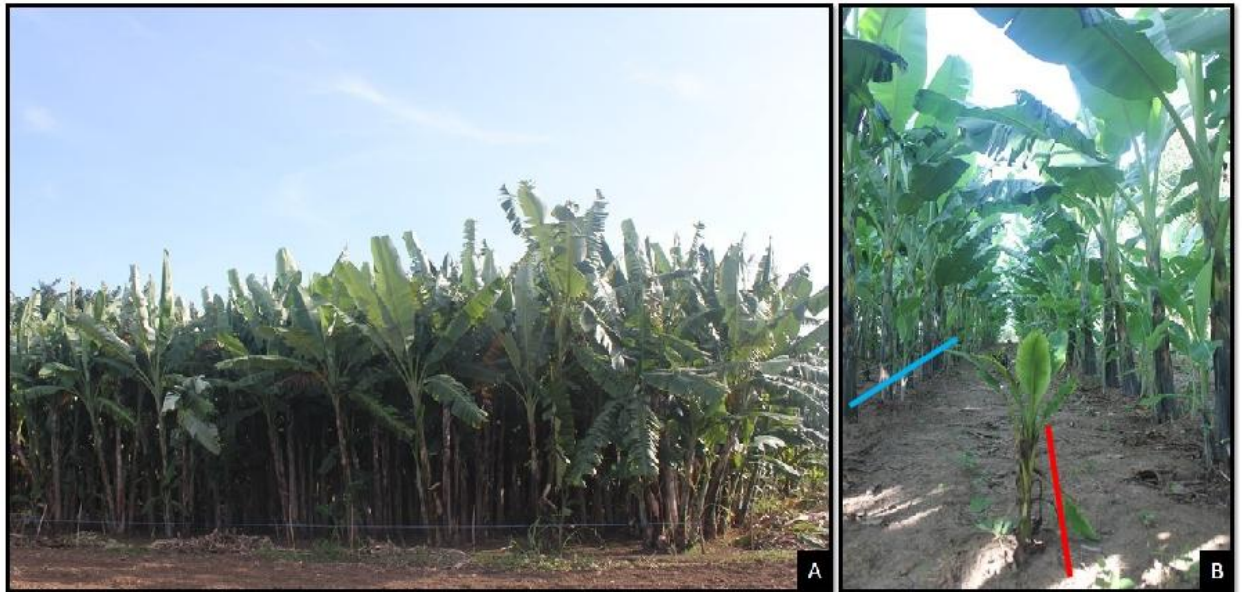

551

552 Figure 4. *Musa balbisiana* accessions screening under field trial: (A) oldest  
 553 standing plot (B) field screening set-up with severely infected cv.  
 554 Lakatan control. Red line represents susceptible control banana cv.  
 555 Lakatan row. Blue line represents *M. balbisiana* row.

556

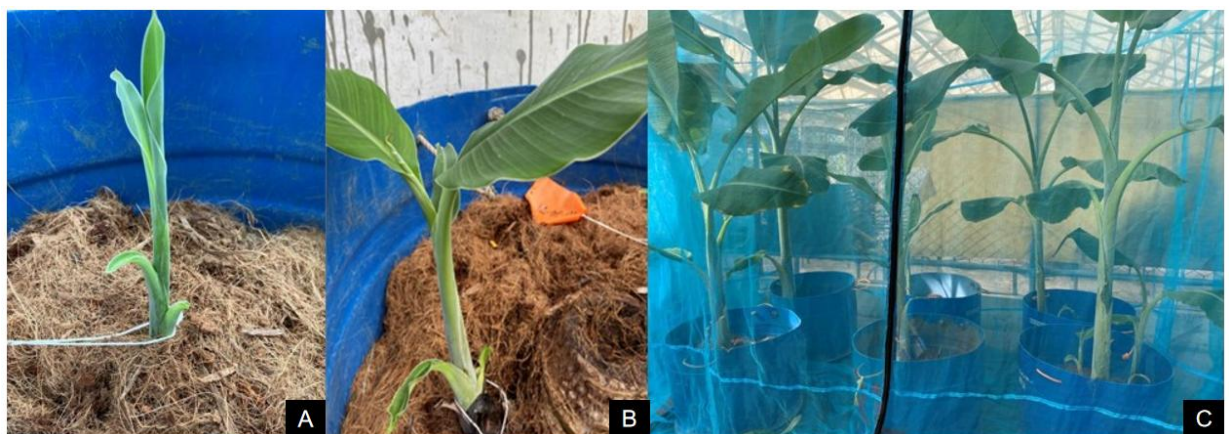

557

558 Figure 5. Post screening result: (a-b) Suckers emerging from corms of wild *M.*  
 559 *balbisiana*; (c) suckers developed and remained negative against BBTv
